# Supplementary material for: NO homeostasis is a key regulator of early nitrate perception and root elongation in maize
Source: PubMed Central journal article supplement (PMC3883287; doi:10.1093/jxb/ert358), 2013-11-12
Supplement: supp_ert358_jexbot105601_file001.pdf [file supp_ert358_jexbot105601_file001.pdf]

## **NO homeostasis is a key regulator of early nitrate perception and root elongation in maize**

Manoli Alessandro, Begheldo Maura, Genre Andrea, Lanfranco Luisa, Trevisan Sara and Quaggiotti Silvia

### **Supplementary data**

#### **Figure S1**

The new improved agar-plate culture system for studying the *Zea mays* L. root response to different nutrients availability.

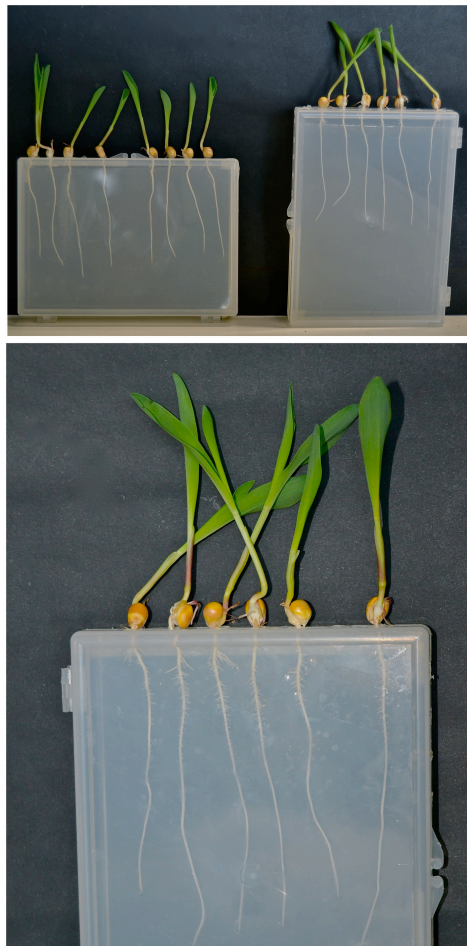

## Figure S2

Time course of the expression of genes following short-term nitrate/ammonium treatments in maize roots (A) and leaves (B). The expression values were investigated at 30 min, 2 h and 6 h. Data are expressed as base-2 logarithm of the ratio between the expression measured for a treatment and that of its own control. The same expression analyses were carried out in nutrient solution either supplied or depleted with nitrate or ammonium.

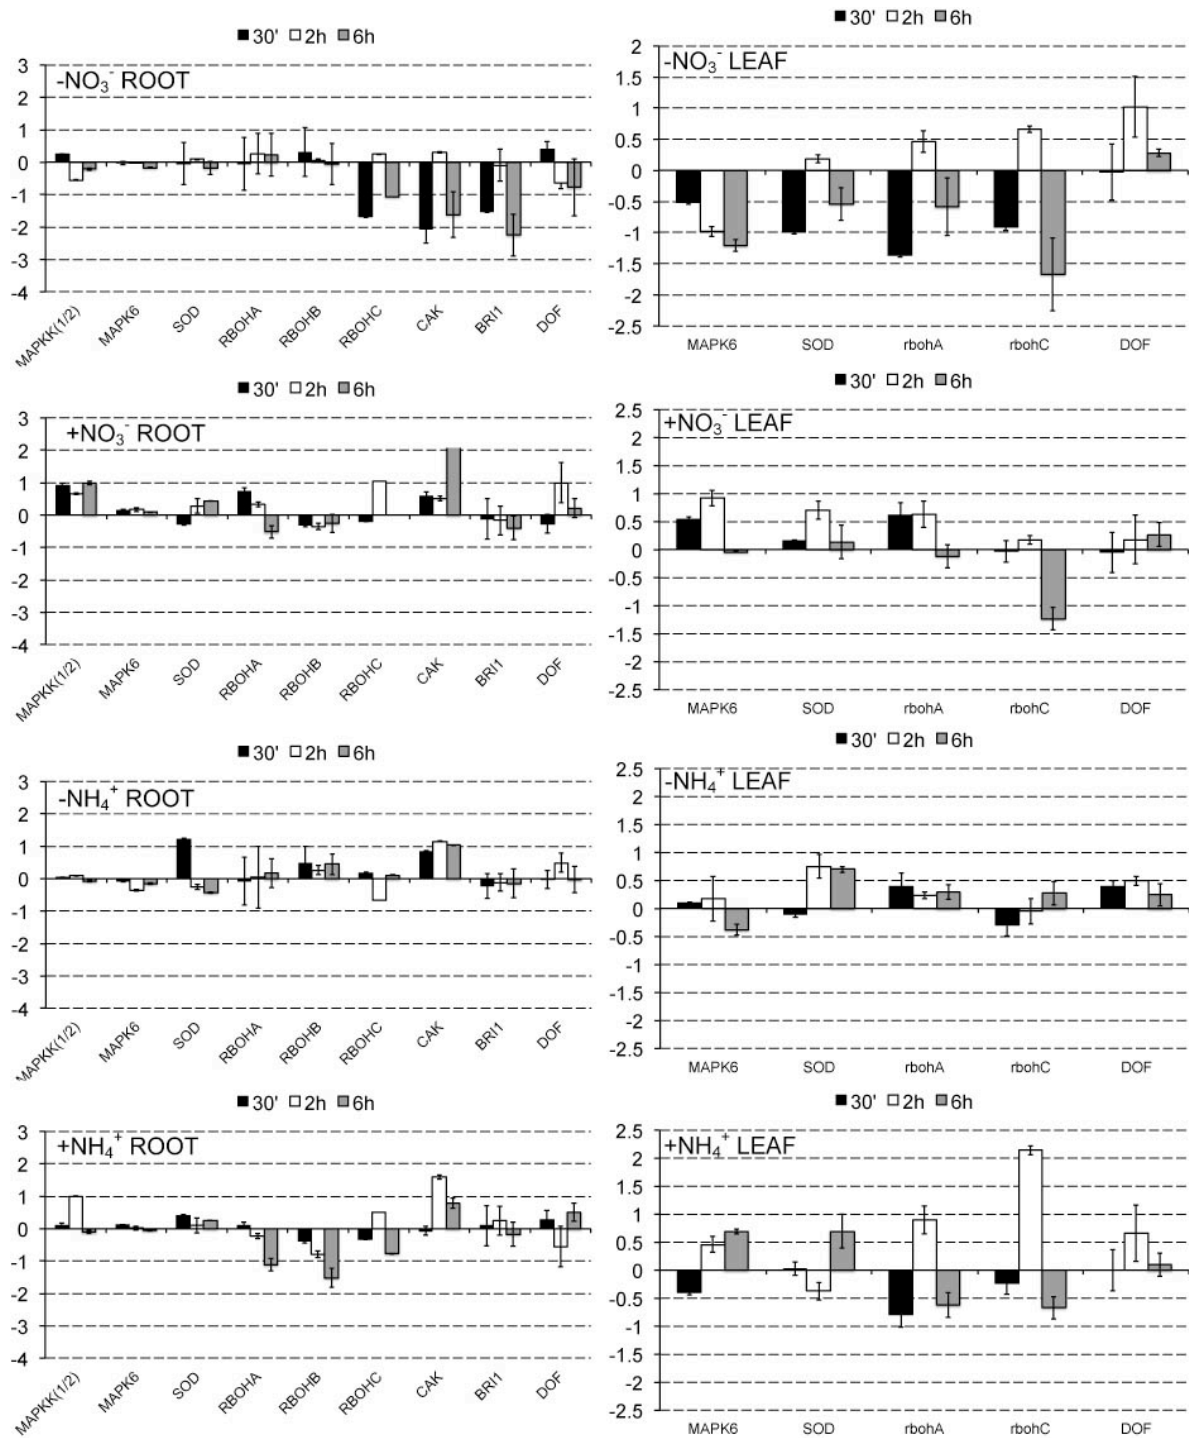

**Figure S3**

Confocal detection of DAF-2T in the transition zone of nitrate treated apices. Arrows indicate two different types of cells of this root zone: small square shape cells (red arrows) with central nucleus (N) and elongated cells (white arrows) with a more developed vacuole (V). Image was obtained by zooming the 40x lens.

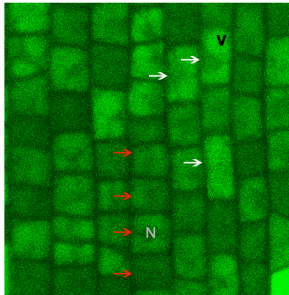

**Figure S4**

Root and leaf fresh weight and relative root/shoot ratio in seedlings grown in nutrient solution for five days (A, B, C).

Total root length (L), total surface area (SA), average diameter (AD), number of root tips and leaf fresh weight in seedlings grown five days in agar medium containing or not 1 mM NO<sub>3</sub><sup>-</sup> (D).

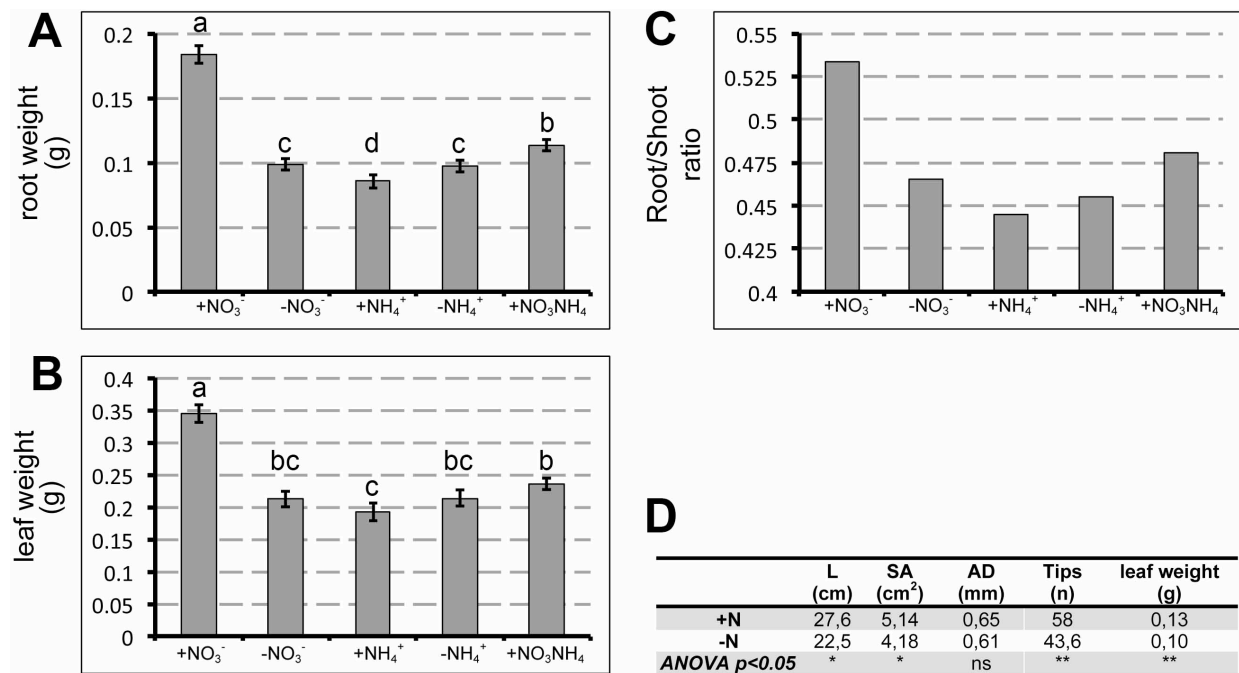

**Table S1**

List of the genes analyzed by means of Real Time qPCR. Maize GDB and NCBI accessions are reported together with the gene functions and the primer sequences.

| <b>Maize GDB<br/>Accession ID</b> | <b>NCBI</b>    | <b>Name</b> | <b>Gene Function</b>                                                 | <b>Fw</b>              | <b>Rv</b>              |
|-----------------------------------|----------------|-------------|----------------------------------------------------------------------|------------------------|------------------------|
| GRMZM2G067402_T02                 | AF236080.1     | Hb          | haemoglobin                                                          | GGAGCCTCGAGATGAAAGAAA  | ACAATACACGGCTCCCTCCAG  |
| GRMZM2G168898_T01                 | NM_001112349.1 | Hb2         | haemoglobin 2                                                        | GGCTGTTGATGCTTCCCTAAGC | ATGACGGGCCCTTTTCTGAAT  |
| GRMZM2G568636                     | AF153448.1     | NR1         | nitrate reductase                                                    | ATGATCCAGTTCCGCCATCTC  | GTCCGTGGTACGTCGTAGGT   |
| GRMZM2G079381                     | EU957616.1     | NiR         | ferredoxin--nitrite reductase                                        | CTTCATGGGCTGCCCTCAC    | CGCTTGACGAAAGGTCTACT   |
| GRMZM2G010280_T01                 | AY129953.1     | NRT2.1      | putative high affinity nitrate transporter                           | GAGAAAGAGCAAGGACTCCA   | CTCATGTCAACGGAGACACAC  |
| GRMZM2G426953_T01                 | DQ855284.1     | rbobA       | respiratory burst oxidase protein A                                  | CAGCGCACACAAGAACTCTC   | CCCCGCATACATCAAAAATT   |
| GRMZM2G138152_T03                 | EU807966.1     | rbobB       | respiratory burst oxidase protein B                                  | TTGGGTTACACGTTGAGCAAG  | AATGGAGCAAAAGGCAACTGT  |
| GRMZM2G043435_T01                 | DQ897930.1     | rbobC       | respiratory burst oxidase protein C                                  | GGCACAGGAAGTAAGCAAGC   | AAACTCATCGCCAAAGAAAAGC |
| GRMZM2G032852_T03                 | AY109304.1     | CaK         | Calcium-dependent protein kinase                                     | AACCACCTTCCCAAGGAGACC  | CTGTGCGTCAAGGAACCTTGC  |
| GRMZM2G015933_T01                 | EU954960.1     | BR11        | BRASSINOSTEROID INSENSITIVE 1-associated receptor kinase 1 precursor | TCCTCTCCCTTGTCCGTTGTT  | AGCCTTGATCCAGGACTCTTC  |
| GRMZM2G002100_T01                 | EU965114.1     | MAPK6       | mitogen-activated protein kinase 6                                   | CACACCCCTTACTTGGCATCA  | ATCACCCGGCTGAAATTTGAAC |
| GRMZM2G106928_T01                 | EU959272.1     | SOD         | superoxide dismutase                                                 | CAGCGCACACAAGAAGACTCTC | CCCCGCATACATCAAAAACCTT |
| GRMZM2G089850_T01                 | NM_001156658.1 | DOF         | dof zinc finger protein MNB1A                                        | CTCCTGCTTTGGCTCTGCTCT  | AATGGAGCAAAAAGGCAACTGT |
| GRMZM2G400470_T03                 | BT065734.1     | MAPKK(1/2)  | Mitogen-Activated Protein Kinase Kinase (1/2)                        | CAACGAGCCTTGTGGAGAACA  | TCTGACCCTTCCCTGTAGTCC  |
| GRMZM2G384293_T02                 | NM_001174573   | NOA1        | putative nitric oxide synthase                                       | ATTCTAACCTTCCGGTGGTGA  | GACAACCCAGTCGCCATATACA |

**Table S2**

Merged effects of different chemicals interfering with NO biosynthesis/scavenging and nitrate supply/depletion on root and leaf fresh weight.

| <b>Treatment</b>                        | <b>Total Root Weight (g)</b> | <b>Leaf Weight (g)</b> |
|-----------------------------------------|------------------------------|------------------------|
| +NO <sub>3</sub> <sup>-</sup>           | 0.07 <i>a</i>                | 0.131 <i>a</i>         |
| + NO <sub>3</sub> <sup>-</sup> +cPTIO   | 0.057 <i>bc</i>              | 0.124 <i>a</i>         |
| + NO <sub>3</sub> <sup>-</sup> +W       | 0.049 <i>c</i>               | 0.127 <i>a</i>         |
| + NO <sub>3</sub> <sup>-</sup> + L-NAME | 0.069 <i>a</i>               | 0.131 <i>a</i>         |
| + NH <sub>4</sub> <sup>+</sup>          | 0.057 <i>bc</i>              | 0.128 <i>a</i>         |
| - NO <sub>3</sub> <sup>-</sup>          | 0.051 <i>bc</i>              | 0.116 <i>a</i>         |
| - NO <sub>3</sub> <sup>-</sup> +SNP     | 0.059 <i>b</i>               | 0.132 <i>a</i>         |
|                                         | <i>P</i> < 0.01              | ns                     |
